# Supplementary material
Source: PubMed Central journal article supplement (PMC7289055)
Supplement: NIHMS1588175-supplement-Supplemental_data.pdf [file NIHMS1588175-supplement-Supplemental_data.pdf]

# Supplemental Figure

**GCET1**

**MUM1**

**CD10**

**BCL6**

**FOXP1**

**GCB**

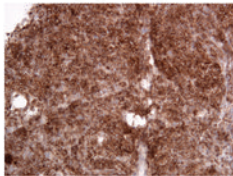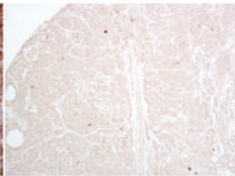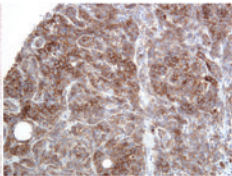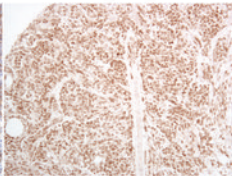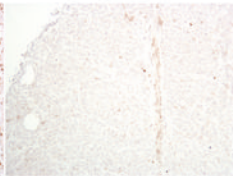

**ABC**

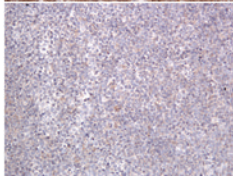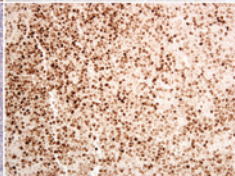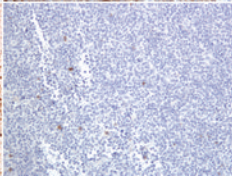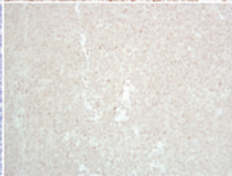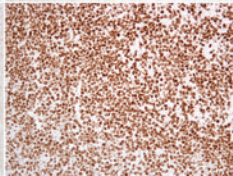

**Supplementary Table 1. Immunohistochemical stain protocols.**

| Antibody  | Clone              | Source                                          | Dilution | Antigen Retrieval                      |                  |                    |
|-----------|--------------------|-------------------------------------------------|----------|----------------------------------------|------------------|--------------------|
|           |                    |                                                 |          | Solution                               | Temperature (°C) | Duration (minutes) |
| GCET1     | RAM341B/C1/C2*     | Montes-Moreno <i>et al</i> (2008) <sup>24</sup> | Neat     | 1mM EDTA (pH 8.0)                      | 115              | 10                 |
| MUM1      | MUM1p <sup>†</sup> | Falini <i>et al</i> (2000) <sup>26</sup>        | 1:10     | Cell Conditioning 1 (Ventana) (pH 8.0) | 95               | 30                 |
| CD10      | 56C6               | Ventana Medical Systems, Inc.                   | Neat     | Cell Conditioning 1 (Ventana) (pH 8.0) | 95               | 60                 |
| BCL6      | PG-B6p             | Dako A/S                                        | 1:60     | Cell Conditioning 2 (Ventana) (pH 6.0) | 95               | 30                 |
| FOXP1     | JC12 <sup>‡</sup>  | Banham <i>et al</i> (2001) <sup>27</sup>        | 1:80     | 1mM EDTA (pH 8.0)                      | 95               | 30                 |
| MTA3      | polyclonal         | Fujita <i>et al</i> (2003) <sup>25</sup>        | 1:1200   | 0.1M Tris (pH 10.0)                    | 120              | 60                 |
| BCL6      | polyclonal         | Santa Cruz Biotechnology                        | 1:75     | 1 mM EDTA (pH 8.0)                     | 95               | 60                 |
| BCL2      | 124                | Dako A/S                                        | 1:20     | Cell Conditioning 1 (Ventana) (pH 8.0) | 95               | 30                 |
| Cyclin D2 | polyclonal         | Santa Cruz Biotechnology                        | 1:500    | 1 mM EDTA (pH 8.0)                     | 95               | 60                 |
| CD20      | L26                | Dako A/S                                        | 1:200    | Cell Conditioning 1 (Ventana) (pH 8.0) | 95               | 8                  |
| CD3       | PS1                | Ventana Medical Systems, Inc.                   | Neat     | Cell Conditioning 1 (Ventana) (pH 8.0) | 95               | 30                 |

EDTA indicates ethylenediaminetetraacetic acid.

\*A commercial antibody for this clone is now available from Abcam Inc., Cambridge, MA, USA

<sup>†</sup>A commercial antibody for this clone is now available from Dako A/S, Carpinteria, CA, USA.

<sup>‡</sup>A commercial antibody for this clone is now available from Abcam Inc., Cambridge, MA, USA, and Novus Biologicals, Inc., Littleton, CO, USA.

**Supplementary Table 2. Patient characteristics of the training set by gene expression profiling classification.**

|                  |            | Number (%) | GCB (%) | ABC (%) | P-value |
|------------------|------------|------------|---------|---------|---------|
|                  |            | 84         | 47      | 37      |         |
| Gender           | Male       | 46 (55)    | 24 (51) | 22 (59) | 0.440   |
|                  | Female     | 38 (45)    | 23 (49) | 15 (41) |         |
| Age (years)      | < 60       | 33 (39)    | 21 (45) | 12 (32) | 0.250   |
|                  | ≥ 60       | 51 (61)    | 26 (55) | 25 (68) |         |
| Karnofsky score  | > 70       | 69 (82)    | 43 (91) | 26 (70) | 0.012   |
|                  | ≤ 70       | 15 (18)    | 4 (9)   | 11 (30) |         |
| Stage            | I/II       | 37 (45)    | 23 (50) | 14 (38) | 0.270   |
|                  | III/IV     | 46 (55)    | 23 (50) | 23 (62) |         |
| Extranodal sites | < 2        | 69 (84)    | 36 (77) | 33 (94) | 0.030   |
|                  | ≥ 2        | 13 (16)    | 11 (24) | 2 (6)   |         |
| LDH              | Normal     | 33 (45)    | 23 (53) | 10 (33) | 0.089   |
|                  | Elevated   | 40 (55)    | 20 (47) | 20 (67) |         |
| IPI score        | Low (0-2)  | 47 (67)    | 31 (74) | 16 (57) | 0.150   |
|                  | High (3-5) | 23 (33)    | 11 (26) | 12 (43) |         |

LDH indicates lactate dehydrogenase; IPI, International Prognostic Index

**Supplementary Table 3. Clinical characteristics of the validation set by gene expression profiling classification.**

|                  |            | Number (%) | GCB (%) | ABC (%) | P-value |
|------------------|------------|------------|---------|---------|---------|
|                  |            | 63         | 37      | 26      |         |
| Gender           | Male       | 29 (46)    | 15 (41) | 14 (54) | 0.300   |
|                  | Female     | 34 (54)    | 22 (59) | 12 (46) |         |
| Age (years)      | < 60       | 29 (46)    | 21 (57) | 8 (31)  | 0.071   |
|                  | ≥ 60       | 34 (54)    | 16 (43) | 18 (69) |         |
| Karnofsky Score  | > 70       | 49 (83)    | 32 (91) | 17 (71) | 0.074   |
|                  | ≤ 70       | 10 (17)    | 3 (9)   | 7 (29)  |         |
| Stage            | I/II       | 30 (50)    | 21 (60) | 9 (36)  | 0.120   |
|                  | III/IV     | 30 (50)    | 14 (40) | 16 (64) |         |
| Extranodal sites | < 2        | 50 (88)    | 30 (91) | 20 (83) | 0.440   |
|                  | ≥ 2        | 7 (12)     | 3 (9)   | 4 (17)  |         |
| LDH              | Normal     | 19 (40)    | 14 (48) | 5 (26)  | 0.130   |
|                  | Elevated   | 29 (60)    | 15 (52) | 14 (74) |         |
| IPI score        | Low (0-2)  | 27 (61)    | 20 (74) | 7 (41)  | 0.055   |
|                  | High (3-5) | 17 (39)    | 7 (26)  | 10 (59) |         |

LDH indicates lactate dehydrogenase; IPI, International Prognostic Index

**Supplementary Table 4. The percentages of positive cases for each immunostain in the GEP-defined subtypes of DLBCL.** All positive results were defined as at least 30% of the lymphoma cells staining positive, except for GCET1, MUM1 and FOXP1, for which at least 80% of the positive lymphoma cells were required for a positive result.

|                                                      | GCET1<br>(%) | CD10<br>(%) | Mono BCL6<br>(%) | Poly BCL6<br>(%) | MTA3<br>(%) | MUM1<br>(%) | FOXP1<br>(%) | BCL2<br>(%) | Cyclin D2<br>(%) |
|------------------------------------------------------|--------------|-------------|------------------|------------------|-------------|-------------|--------------|-------------|------------------|
| GCB (n=47)                                           | 57           | 57          | 89               | 83               | 67          | 6           | 30           | 50          | 0                |
| ABC (n=37)                                           | 8            | 5           | 62               | 35               | 57          | 53          | 73           | 59          | 32               |
| Unclassified<br>(GCB by the new<br>algorithm) (n=7)  | 14           | 43          | 86               | 29               | 43          | 14          | 14           | 43          | 0                |
| Unclassified<br>(ABC by the new<br>algorithm) (n=12) | 0            | 0           | 25               | 25               | 25          | 0           | 25           | 25          | 17               |
| PMBL (n=7)                                           | 43           | 14          | 71               | 43               | 29          | 14          | 0            | 29          | 0                |
